# Supplementary material
Source: publisher figshare collection journal article supplement (https://tandf.figshare.com/articles/dataset/_/5281297)
Supplement: Supplementary file 1 [file 1]

| Ordered                            | ● |   |   |   |   |      |   |   |   |    |    |
|------------------------------------|---|---|---|---|---|------|---|---|---|----|----|
| Character #                        | 1 | 2 | 3 | 4 | 5 | 6    | 7 | 8 | 9 | 10 | 11 |
| <i>Archaeopteryx_lithographica</i> | 0 | 0 | 0 | 0 | 0 | 0    | 0 | 0 | 0 | 0  | ?  |
| <i>Protopteryx_fengningensis</i>   | ? | 0 | ? | ? | ? | ?    | ? | ? | ? | ?  | ?  |
| <i>Pengornis_houi</i>              | 0 | 0 | 0 | 0 | ? | ?    | ? | ? | ? | ?  | ?  |
| <i>Apsaravis_ukhaana</i>           | ? | ? | ? | 1 | ? | ?    | ? | ? | ? | ?  | ?  |
| <i>Gansus_yumenensis</i>           | ? | ? | ? | ? | ? | ?    | ? | ? | ? | ?  | ?  |
| <i>Enaliornis</i>                  | ? | ? | ? | ? | ? | ?    | ? | 0 | 0 | 0  | ?  |
| <i>Pasquiaornis</i>                | ? | ? | ? | ? | ? | ?    | ? | ? | ? | ?  | ?  |
| <b><i>Chupkaornis_keraorum</i></b> | ? | ? | ? | ? | ? | ?    | ? | ? | ? | ?  | ?  |
| <i>Brodavis</i>                    | ? | ? | ? | ? | ? | ?    | ? | ? | ? | ?  | ?  |
| <i>Baptornis_advenus</i>           | ? | ? | ? | ? | ? | ?    | ? | ? | ? | ?  | ?  |
| <i>Fumicollis_hoffmani</i>         | ? | ? | ? | ? | ? | ?    | ? | ? | ? | ?  | ?  |
| <i>Parahesperornis_alexi</i>       | 1 | 1 | 0 | 0 | 0 | [12] | 1 | 0 | 0 | 0  | ?  |
| <i>Hesperornis_regalis</i>         | 1 | 1 | 0 | 0 | ? | [12] | 1 | ? | ? | ?  | 1  |
| <i>Hesperornis_gracilis</i>        | ? | ? | ? | ? | ? | ?    | ? | ? | ? | ?  | ?  |
| <i>Ichthyornis_dispar</i>          | 1 | 1 | 0 | 0 | 0 | 1    | 1 | ? | 0 | ?  | ?  |
| <i>Lithornis</i>                   | 1 | 1 | 1 | 1 | 1 | 1    | 1 | 1 | 1 | 1  | 0  |
| <i>Vegavis_iaai</i>                | ? | ? | ? | ? | ? | ?    | ? | ? | ? | ?  | ?  |
| <i>Crypturellus_undulatus</i>      | 1 | 1 | 1 | 1 | 1 | 1    | 1 | 1 | 1 | 1  | 0  |
| <i>Chauna_torquata</i>             | 1 | 1 | 1 | 1 | 1 | 2    | 1 | 1 | 1 | 1  | 1  |
| <i>Anas_platyrhynchos</i>          | 1 | 1 | 1 | 1 | 1 | 2    | 1 | 1 | 1 | 1  | 1  |
| <i>Gallus_gallus</i>               | 1 | 1 | 1 | 1 | 1 | 2    | 1 | 1 | 1 | 1  | 1  |
| <i>Phasianus_colchicus</i>         | 1 | 1 | 1 | 1 | 1 | 2    | 1 | 1 | 1 | 1  | 1  |

•

| 12 | 13 | 14 | 15 | 16 | 17 | 18 | 19 | 20 | 21 | 22 | 23 | 24 | 25 | 26   | 27 |
|----|----|----|----|----|----|----|----|----|----|----|----|----|----|------|----|
| 0  | 0  | 0  | 0  | ?  | 0  | 0  | 0  | 0  | 0  | 0  | 0  | 0  | 0  | 0    | 0  |
| ?  | ?  | ?  | ?  | ?  | ?  | ?  | ?  | ?  | ?  | ?  | ?  | ?  | 0  | ?    | ?  |
| ?  | ?  | ?  | ?  | ?  | ?  | ?  | ?  | ?  | ?  | ?  | ?  | ?  | 0  | [12] | ?  |
| ?  | ?  | ?  | ?  | ?  | 0  | ?  | 1  | ?  | ?  | ?  | 1  | ?  | 0  | 2    | ?  |
| ?  | ?  | ?  | ?  | ?  | ?  | ?  | ?  | ?  | ?  | ?  | ?  | ?  | ?  | ?    | 0  |
| 1  | ?  | ?  | ?  | ?  | ?  | ?  | 1  | ?  | ?  | ?  | ?  | ?  | ?  | 2    | ?  |
| ?  | ?  | 1  | ?  | ?  | ?  | ?  | ?  | ?  | ?  | ?  | ?  | ?  | ?  | 2    | ?  |
| ?  | ?  | ?  | ?  | ?  | ?  | ?  | ?  | ?  | ?  | ?  | ?  | ?  | ?  | 2    | ?  |
| ?  | ?  | ?  | ?  | ?  | ?  | ?  | ?  | ?  | ?  | ?  | ?  | ?  | ?  | ?    | 1  |
| ?  | ?  | ?  | ?  | ?  | ?  | ?  | ?  | ?  | ?  | ?  | ?  | ?  | ?  | 2    | ?  |
| ?  | ?  | ?  | ?  | ?  | ?  | ?  | ?  | ?  | ?  | ?  | ?  | ?  | ?  | 2    | 1  |
| 1  | ?  | 1  | 1  | 0  | 0  | 1  | 1  | 0  | ?  | 1  | 0  | ?  | 0  | 2    | 1  |
| ?  | ?  | ?  | ?  | ?  | ?  | ?  | ?  | ?  | ?  | ?  | 0  | ?  | 0  | 2    | 1  |
| ?  | ?  | ?  | ?  | ?  | ?  | ?  | ?  | ?  | ?  | ?  | ?  | ?  | ?  | 2    | ?  |
| 0  | 1  | 1  | 1  | 1  | 0  | 1  | 1  | 0  | 1  | 1  | 0  | 2  | 0  | 0    | 1  |
| 1  | 1  | 1  | 1  | 1  | 1  | 1  | 1  | 1  | 1  | 1  | 1  | 1  | 1  | 2    | 1  |
| ?  | ?  | ?  | ?  | ?  | ?  | ?  | ?  | ?  | ?  | ?  | ?  | ?  | ?  | 2    | ?  |
| 1  | 1  | 1  | 1  | 1  | 1  | 1  | 1  | 1  | 1  | 1  | 1  | 1  | 1  | 2    | 1  |
| 1  | 1  | 1  | 1  | 1  | 1  | 1  | 1  | 1  | 1  | 1  | 0  | 0  | 0  | 2    | 1  |
| 1  | 1  | 1  | 1  | 1  | 1  | 1  | 1  | 1  | 1  | 1  | 0  | 0  | 0  | 2    | 1  |
| 1  | 1  | 1  | 1  | 1  | 1  | 1  | 1  | 1  | 1  | 1  | 0  | 0  | 0  | 2    | 1  |

| 28 | 29 | 30 | 31 | 32 | 33 | 34 | 35   | 36 | 37   | 38 | 39 | 40 | 41 | 42 | 43 |
|----|----|----|----|----|----|----|------|----|------|----|----|----|----|----|----|
| 0  | 0  | 0  | 0  | 0  | 0  | 0  | 0    | 0  | 0    | 0  | 0  | 0  | 0  | 0  | 0  |
| ?  | 1  | 0  | ?  | 0  | ?  | 0  | 0    | ?  | 1    | ?  | ?  | 1  | 1  | ?  | ?  |
| 0  | ?  | 0  | 0  | 0  | 0  | 0  | 0    | ?  | 1    | ?  | ?  | 2  | 1  | ?  | ?  |
| ?  | 2  | 0  | 0  | 1  | 2  | ?  | [01] | 0  | 4    | 1  | ?  | 2  | 1  | 0  | 1  |
| 0  | 2  | 0  | 0  | 1  | 0  | 0  | 0    | 0  | 4    | 1  | ?  | 2  | 1  | 0  | 1  |
| ?  | ?  | 1  | ?  | 1  | ?  | ?  | 0    | ?  | ?    | ?  | ?  | ?  | ?  | ?  | 1  |
| 1  | ?  | 1  | 0  | 1  | 0  | 0  | 0    | 0  | ?    | ?  | 0  | ?  | ?  | ?  | ?  |
| ?  | ?  | 2  | 0  | 1  | 0  | 0  | 0    | ?  | ?    | ?  | ?  | ?  | ?  | ?  | ?  |
| ?  | ?  | 2  | 0  | 1  | 1  | 0  | 0    | 1  | ?    | ?  | ?  | ?  | ?  | ?  | ?  |
| 1  | 3  | 2  | 0  | 1  | 1  | 0  | 0    | 1  | [45] | 0  | 1  | 1  | ?  | 0  | 1  |
| 1  | 3  | 2  | 0  | 1  | 1  | 0  | 0    | 1  | ?    | ?  | ?  | ?  | ?  | ?  | ?  |
| 1  | 3  | 2  | 0  | 1  | 1  | 0  | 0    | 1  | 5    | 0  | 1  | 1  | 0  | 0  | 1  |
| 1  | 3  | 2  | 0  | 1  | 1  | 0  | 0    | 1  | 5    | 0  | 1  | 1  | 0  | 0  | 1  |
| 1  | ?  | 2  | ?  | 1  | 1  | 0  | ?    | ?  | ?    | ?  | ?  | ?  | ?  | ?  | ?  |
| 1  | ?  | 0  | 0  | 1  | 0  | 1  | 0    | 0  | [45] | 2  | 0  | 2  | 1  | 0  | 2  |
| 1  | 3  | 2  | 0  | 1  | 2  | ?  | 0    | 1  | [56] | 2  | 1  | 2  | 1  | 1  | ?  |
| ?  | ?  | 2  | ?  | 1  | ?  | ?  | ?    | ?  | [56] | 2  | ?  | ?  | ?  | ?  | ?  |
| 1  | 3  | 2  | 0  | 1  | 2  | 1  | 1    | 1  | 6    | 2  | 1  | 2  | 1  | 1  | 1  |
| 1  | 3  | 2  | 0  | 1  | 2  | 1  | 0    | 1  | 6    | 2  | 1  | 2  | 1  | 0  | 1  |
| 1  | 3  | 2  | 0  | 1  | 2  | 1  | 0    | 1  | 6    | 2  | 1  | 2  | 1  | 0  | 1  |
| 1  | 3  | 2  | 0  | 1  | 2  | 1  | 1    | 1  | 6    | 2  | 1  | 2  | 1  | 0  | 1  |
| 1  | 3  | 2  | 0  | 1  | 2  | 1  | 1    | 1  | 6    | 2  | 1  | 2  | 1  | 0  | 1  |

| ●    | ●  | ●    |    |      |    |    |    | ●  |    | ●    |    |    |    |    |    |
|------|----|------|----|------|----|----|----|----|----|------|----|----|----|----|----|
| 44   | 45 | 46   | 47 | 48   | 49 | 50 | 51 | 52 | 53 | 54   | 55 | 56 | 57 | 58 | 59 |
| ?    | ?  | 0    | 0  | [01] | ?  | ?  | ?  | ?  | ?  | 0    | 0  | 0  | 0  | 0  | 0  |
| 0    | ?  | 0    | 0  | 2    | ?  | ?  | 1  | ?  | ?  | 2    | 1  | 1  | ?  | 1  | ?  |
| 0    | 1  | 0    | 0  | ?    | ?  | ?  | ?  | ?  | ?  | 2    | 1  | 1  | ?  | ?  | ?  |
| ?    | 0  | ?    | ?  | 3    | ?  | ?  | 1  | ?  | ?  | ?    | 1  | 1  | 0  | 1  | 0  |
| 1    | 0  | 1    | 0  | 3    | ?  | ?  | 1  | ?  | 1  | 0    | 1  | 1  | 1  | 1  | 0  |
| ?    | ?  | ?    | ?  | ?    | ?  | ?  | ?  | ?  | ?  | ?    | ?  | ?  | ?  | ?  | ?  |
| ?    | ?  | 1    | ?  | ?    | ?  | ?  | ?  | ?  | ?  | ?    | 1  | 1  | 1  | 1  | 0  |
| ?    | ?  | ?    | ?  | ?    | ?  | ?  | ?  | ?  | ?  | ?    | ?  | ?  | ?  | ?  | ?  |
| ?    | ?  | 1    | ?  | ?    | ?  | ?  | ?  | ?  | ?  | ?    | ?  | ?  | ?  | ?  | ?  |
| 2    | ?  | ?    | ?  | ?    | ?  | ?  | ?  | ?  | ?  | ?    | 1  | 1  | 0  | 1  | 1  |
| 2    | 0  | 1    | ?  | ?    | ?  | 0  | 0  | ?  | ?  | ?    | ?  | 1  | 0  | ?  | 1  |
| 2    | 0  | 1    | ?  | 1    | 0  | 0  | 0  | ?  | 0  | ?    | 1  | 1  | 0  | 1  | 1  |
| 2    | 0  | 1    | ?  | 1    | 0  | 0  | 0  | 1  | 0  | ?    | 1  | 1  | 0  | 1  | 1  |
| ?    | ?  | ?    | ?  | ?    | ?  | ?  | ?  | ?  | ?  | ?    | ?  | ?  | ?  | ?  | ?  |
| [12] | 0  | ?    | ?  | 3    | 1  | 0  | 2  | 2  | 0  | 0    | 1  | 1  | 1  | 1  | 0  |
| [12] | 0  | [12] | 1  | 3    | 1  | 1  | 2  | 2  | 1  | 0    | 1  | 1  | 1  | 1  | 0  |
| ?    | ?  | ?    | ?  | ?    | ?  | ?  | ?  | ?  | ?  | ?    | 1  | 1  | ?  | 1  | ?  |
| 2    | 0  | 2    | 1  | 3    | 1  | 1  | 1  | 2  | ?  | 0    | 1  | 1  | 1  | 1  | 0  |
| 1    | 0  | 1    | 1  | 3    | 1  | 1  | 1  | 4  | 0  | [01] | 1  | 1  | 1  | 1  | 0  |
| 1    | 0  | 2    | 1  | 3    | 1  | 1  | 1  | 3  | 1  | 1    | 1  | 1  | 1  | 1  | 0  |
| 1    | 0  | [12] | 1  | 3    | 1  | 1  | 1  | 2  | 1  | 2    | 1  | 1  | 1  | 1  | 0  |
| 1    | 0  | 2    | 1  | 3    | 1  | 1  | 1  | 2  | 1  | 2    | 1  | 1  | 1  | 1  | 0  |

| 60 | 61 | 62 | 63 | 64 | 65 | 66 | 67 | 68 | 69 | 70 | 71 | 72   | 73 | 74 | 75 |
|----|----|----|----|----|----|----|----|----|----|----|----|------|----|----|----|
| 0  | 0  | 0  | 0  | 0  | 0  | 0  | 0  | 0  | 0  | ?  | 0  | 0    | 0  | 0  | 0  |
| 1  | 0  | 0  | 0  | ?  | 0  | 1  | 0  | 0  | 0  | 0  | 0  | ?    | ?  | ?  | ?  |
| 1  | 0  | 0  | 0  | ?  | 0  | 1  | 0  | ?  | 0  | 0  | 0  | 0    | ?  | 0  | ?  |
| 1  | 1  | 1  | 0  | 1  | 0  | 1  | 0  | ?  | 0  | ?  | 0  | 0    | 0  | 0  | 0  |
| 1  | 1  | 0  | 0  | 0  | 1  | 1  | 0  | 1  | 0  | 0  | 2  | 0    | 1  | 2  | 0  |
| ?  | ?  | ?  | ?  | ?  | ?  | ?  | ?  | ?  | ?  | ?  | ?  | ?    | ?  | ?  | ?  |
| ?  | 1  | ?  | 0  | 0  | 1  | 1  | 0  | 1  | 0  | 0  | ?  | 0    | 1  | 1  | 0  |
| ?  | ?  | ?  | ?  | ?  | ?  | ?  | ?  | ?  | ?  | ?  | ?  | ?    | ?  | ?  | ?  |
| ?  | ?  | ?  | ?  | ?  | ?  | ?  | ?  | ?  | ?  | ?  | ?  | ?    | ?  | ?  | ?  |
| ?  | ?  | ?  | 1  | 0  | 0  | 1  | 1  | 1  | 0  | 0  | 0  | 0    | 0  | 0  | 0  |
| ?  | ?  | ?  | ?  | ?  | 0  | ?  | ?  | ?  | ?  | ?  | ?  | ?    | ?  | 0  | ?  |
| ?  | 1  | 0  | 1  | 0  | ?  | 2  | 1  | 1  | 0  | 0  | 0  | 0    | 0  | 0  | 0  |
| 0  | 1  | 0  | 1  | 0  | ?  | 2  | 1  | 1  | 0  | 0  | 0  | 0    | 0  | 0  | 0  |
| ?  | ?  | ?  | ?  | ?  | ?  | ?  | ?  | ?  | ?  | ?  | ?  | ?    | ?  | ?  | ?  |
| 1  | 1  | 1  | 1  | 0  | 1  | 1  | 0  | 1  | 0  | 0  | 2  | 0    | 1  | 2  | 0  |
| 1  | 1  | ?  | 0  | 1  | 1  | 1  | 0  | 1  | 1  | 0  | 1  | 1    | 1  | 2  | 0  |
| ?  | 1  | ?  | ?  | ?  | ?  | 1  | 0  | 1  | 0  | ?  | 1  | ?    | 1  | 2  | 0  |
| 1  | 1  | 1  | 0  | 0  | 1  | 1  | 0  | 1  | 1  | 0  | 1  | 0    | 1  | 2  | 1  |
| 1  | 1  | 0  | 1  | 0  | 1  | 1  | 0  | 1  | 1  | 1  | 1  | 1    | 1  | 1  | 1  |
| 1  | 1  | 0  | 0  | 0  | 1  | 1  | 0  | 1  | 0  | ?  | 1  | [01] | 1  | 2  | 1  |
| 1  | 1  | 1  | 0  | 0  | 1  | 1  | 0  | 1  | 1  | 1  | 1  | 1    | 1  | 2  | 1  |
| 1  | 1  | 1  | 0  | 0  | 1  | 1  | 0  | 1  | 1  | 1  | 1  | 1    | 1  | 2  | 1  |

| 76 | 77 | 78 | 79 | 80 | 81 | 82 | 83 | 84 | 85 | 86 | 87 | 88 | 89 | 90 | 91 |
|----|----|----|----|----|----|----|----|----|----|----|----|----|----|----|----|
| 0  | 0  | 0  | 0  | 0  | 0  | 0  | 0  | ?  | 0  | 0  | 1  | 1  | 0  | 0  | 0  |
| ?  | 0  | ?  | 0  | 1  | 0  | 0  | ?  | ?  | 0  | ?  | 0  | 0  | 1  | ?  | 0  |
| ?  | ?  | ?  | 0  | 1  | 0  | 0  | ?  | ?  | 0  | ?  | 0  | 0  | 1  | ?  | 0  |
| 0  | 0  | 1  | 0  | 1  | 1  | 1  | 1  | ?  | 0  | 1  | 0  | 1  | 1  | 1  | 0  |
| 1  | 0  | 1  | 0  | 1  | 1  | 1  | 1  | 0  | 0  | 1  | 0  | 2  | 1  | 1  | 0  |
| ?  | ?  | ?  | ?  | ?  | ?  | ?  | ?  | ?  | ?  | ?  | ?  | ?  | ?  | ?  | ?  |
| 1  | ?  | 1  | 0  | ?  | 1  | 1  | 1  | 0  | 0  | 1  | 1  | 0  | ?  | ?  | 0  |
| ?  | ?  | ?  | ?  | ?  | ?  | ?  | ?  | ?  | ?  | ?  | ?  | ?  | ?  | ?  | ?  |
| ?  | ?  | ?  | ?  | ?  | ?  | ?  | ?  | ?  | ?  | ?  | ?  | ?  | ?  | ?  | ?  |
| 1  | ?  | 1  | 1  | 0  | ?  | ?  | ?  | ?  | 0  | ?  | ?  | ?  | ?  | ?  | ?  |
| ?  | 1  | ?  | ?  | ?  | ?  | ?  | ?  | ?  | ?  | ?  | ?  | ?  | ?  | ?  | ?  |
| 1  | 1  | 1  | 1  | ?  | ?  | ?  | ?  | ?  | 0  | ?  | ?  | ?  | ?  | ?  | ?  |
| 1  | 1  | 1  | 1  | ?  | 1  | 1  | 0  | ?  | 0  | 0  | 0  | 0  | 0  | 0  | 0  |
| ?  | ?  | ?  | ?  | ?  | ?  | ?  | ?  | ?  | ?  | ?  | ?  | ?  | ?  | ?  | ?  |
| 1  | 0  | 1  | 0  | 1  | 1  | 1  | 1  | 0  | 0  | 1  | 0  | 1  | 1  | 1  | 0  |
| 1  | 0  | 1  | 0  | 1  | 1  | 1  | 1  | 0  | 0  | 1  | 1  | 0  | 0  | 1  | 1  |
| 1  | ?  | ?  | ?  | ?  | 1  | 1  | ?  | ?  | 0  | 1  | 1  | 0  | ?  | ?  | 0  |
| 1  | 0  | 1  | 0  | 1  | 1  | 1  | 1  | 1  | 0  | 1  | 1  | 0  | 0  | 1  | 1  |
| 1  | 0  | 1  | 0  | 2  | 1  | 1  | 1  | 0  | 0  | 1  | 1  | 0  | 0  | 1  | 1  |
| 1  | 0  | 1  | 0  | 0  | 1  | 1  | 1  | 0  | 0  | 1  | 1  | 0  | 0  | 1  | 1  |
| 1  | 0  | 1  | 0  | 1  | 1  | 1  | 1  | 1  | 0  | 1  | 1  | 0  | 0  | 1  | 1  |
| 1  | 0  | 1  | 0  | 1  | 1  | 1  | 1  | 1  | 0  | 1  | 1  | 0  | 0  | 1  | 1  |

| 92 | 93 | 94 | 95 | 96 | 97 | 98 | 99 | 100 | 101 | 102 | 103 | 104 | 105 | 106 | 107 |
|----|----|----|----|----|----|----|----|-----|-----|-----|-----|-----|-----|-----|-----|
| 0  | ?  | 0  | 0  | ?  | 0  | 0  | 0  | ?   | 0   | 0   | 0   | 0   | 0   | 0   | 0   |
| 0  | ?  | 1  | 0  | ?  | ?  | ?  | ?  | ?   | ?   | ?   | ?   | 0   | ?   | ?   | 0   |
| 0  | 1  | 1  | 0  | 1  | 1  | 1  | 0  | ?   | ?   | 0   | 0   | 0   | 0   | ?   | 0   |
| 0  | 1  | 1  | 1  | 1  | 1  | 1  | 0  | 1   | 0   | 0   | 0   | 0   | 0   | 0   | 1   |
| 0  | 0  | 1  | 0  | 0  | 0  | 0  | 1  | 1   | 1   | 0   | 0   | 0   | 0   | 0   | 1   |
| ?  | ?  | ?  | ?  | ?  | ?  | ?  | ?  | ?   | ?   | ?   | ?   | ?   | ?   | ?   | ?   |
| 0  | 0  | 1  | 0  | 0  | 0  | 0  | 1  | 1   | 1   | 0   | 0   | 0   | 1   | 0   | 1   |
| ?  | ?  | ?  | ?  | ?  | ?  | ?  | ?  | ?   | ?   | ?   | ?   | ?   | ?   | ?   | ?   |
| ?  | ?  | ?  | ?  | ?  | ?  | ?  | ?  | ?   | ?   | ?   | ?   | ?   | ?   | ?   | ?   |
| 1  | 1  | 1  | 2  | 0  | 0  | 0  | 0  | 1   | 0   | 0   | 0   | ?   | 0   | 1   | 0   |
| ?  | ?  | ?  | ?  | ?  | ?  | ?  | ?  | ?   | ?   | ?   | ?   | ?   | ?   | ?   | ?   |
| 1  | 1  | 1  | 2  | 0  | 0  | 0  | 0  | 1   | 0   | 0   | 0   | 1   | 0   | 1   | ?   |
| 1  | 1  | 1  | 2  | 0  | 0  | 0  | 0  | 1   | 0   | 0   | 0   | 1   | 0   | 1   | ?   |
| ?  | ?  | ?  | ?  | ?  | ?  | ?  | ?  | ?   | ?   | ?   | ?   | ?   | ?   | ?   | ?   |
| 0  | 0  | 1  | 0  | 0  | 0  | 0  | 1  | 0   | 1   | 0   | 1   | 0   | 1   | 0   | 1   |
| 0  | 0  | 1  | 0  | 0  | 0  | 0  | 1  | 0   | 1   | 0   | 1   | 0   | 1   | 0   | 1   |
| ?  | ?  | 1  | 0  | ?  | 0  | 0  | 1  | 0   | ?   | 1   | 1   | ?   | ?   | ?   | ?   |
| 0  | 0  | 1  | 0  | 0  | 0  | 0  | 1  | 0   | 1   | 0   | 1   | 0   | 1   | 0   | 1   |
| 0  | 0  | 1  | 0  | 0  | 0  | 0  | 1  | 0   | 1   | 1   | 1   | 0   | 1   | 0   | 1   |
| 0  | 0  | 1  | 0  | 0  | 0  | 0  | 1  | 0   | 1   | 1   | 1   | 0   | 1   | 0   | 1   |
| 0  | 0  | 1  | 0  | 0  | 0  | 0  | 1  | 0   | 1   | 1   | 1   | 0   | 1   | 0   | 1   |
| 0  | 0  | 1  | 0  | 0  | 0  | 0  | 1  | 0   | 1   | 1   | 1   | 0   | 1   | 0   | 1   |

| 108 | 109  | 110 | 111 | 112 | 113  | 114 | 115 | 116 | 117 | 118 | 119 | 120 | 121 | 122  | 123 |
|-----|------|-----|-----|-----|------|-----|-----|-----|-----|-----|-----|-----|-----|------|-----|
| 0   | 0    | 0   | 0   | 0   | 0    | 0   | 0   | 0   | 1   | 0   | 0   | 0   | 1   | 0    | 0   |
| ?   | ?    | 1   | ?   | 1   | 1    | ?   | 0   | 0   | ?   | ?   | ?   | ?   | ?   | ?    | 0   |
| ?   | ?    | 1   | 1   | 1   | [12] | 1   | 0   | ?   | ?   | 1   | 1   | ?   | ?   | ?    | 0   |
| 0   | 2    | 1   | 1   | 1   | [23] | 1   | 2   | 1   | 1   | 1   | 1   | 1   | 0   | ?    | 1   |
| 1   | 2    | 1   | 1   | 1   | 3    | 1   | 2   | 1   | 1   | 1   | 1   | 1   | 0   | 0    | 1   |
| ?   | ?    | ?   | ?   | ?   | ?    | ?   | ?   | ?   | ?   | ?   | ?   | ?   | ?   | ?    | ?   |
| 1   | 2    | 1   | 1   | ?   | 3    | 1   | 2   | 0   | 2   | 1   | 1   | 1   | 0   | ?    | 1   |
| ?   | ?    | ?   | ?   | ?   | ?    | ?   | ?   | ?   | ?   | ?   | ?   | ?   | ?   | ?    | ?   |
| ?   | ?    | ?   | ?   | ?   | ?    | ?   | ?   | ?   | ?   | ?   | ?   | ?   | ?   | ?    | ?   |
| 0   | [01] | 1   | 1   | ?   | ?    | ?   | ?   | ?   | ?   | ?   | ?   | ?   | ?   | ?    | ?   |
| ?   | ?    | ?   | ?   | ?   | ?    | ?   | ?   | ?   | ?   | ?   | ?   | ?   | ?   | ?    | ?   |
| ?   | ?    | ?   | ?   | ?   | ?    | ?   | ?   | ?   | ?   | ?   | ?   | ?   | ?   | ?    | ?   |
| ?   | ?    | ?   | ?   | ?   | ?    | ?   | ?   | ?   | ?   | ?   | ?   | ?   | ?   | ?    | ?   |
| 1   | 2    | 1   | 1   | 1   | 3    | 1   | 2   | 2   | 0   | 1   | 1   | 1   | 0   | 1    | 1   |
| 1   | 1    | 1   | 1   | 1   | 3    | 1   | 2   | 2   | 0   | 1   | 1   | 1   | 0   | [01] | 1   |
| ?   | ?    | ?   | 1   | ?   | ?    | ?   | ?   | ?   | ?   | ?   | ?   | ?   | ?   | ?    | ?   |
| 1   | 1    | 1   | 1   | 1   | 3    | 1   | 2   | 2   | 0   | 1   | 1   | 1   | 0   | 1    | 1   |
| 1   | 1    | 1   | 1   | 1   | 3    | 1   | 2   | 2   | 0   | 1   | 1   | 1   | 0   | 0    | 1   |
| 1   | 1    | 1   | 1   | 1   | 3    | 1   | 2   | 2   | 0   | 1   | 1   | 1   | 0   | 0    | 1   |
| 1   | 1    | 1   | 1   | 1   | 3    | 1   | 2   | 2   | 0   | 1   | 1   | 1   | 0   | 1    | 2   |
| 1   | 1    | 1   | 1   | 1   | 3    | 1   | 2   | 2   | 0   | 1   | 1   | 1   | 0   | 1    | 2   |



| 124 | 125 | 126 | 127 | 128 | 129 | 130 | 131 | 132 | 133 | 134 | 135 | 136 | 137  | 138 | 139 |
|-----|-----|-----|-----|-----|-----|-----|-----|-----|-----|-----|-----|-----|------|-----|-----|
| 0   | 0   | 0   | 0   | 0   | 0   | 0   | 0   | 0   | 0   | 0   | 0   | 0   | 0    | ?   | 0   |
| 0   | 0   | ?   | ?   | ?   | ?   | ?   | ?   | ?   | ?   | ?   | ?   | ?   | ?    | ?   | ?   |
| 0   | ?   | ?   | ?   | 0   | 0   | 0   | 0   | 0   | ?   | 0   | ?   | 0   | ?    | ?   | ?   |
| 1   | 1   | 0   | 1   | 2   | 0   | 1   | 0   | 1   | 1   | 0   | 0   | 0   | [01] | 1   | 1   |
| 1   | 1   | 0   | 1   | 2   | 0   | 0   | 0   | 0   | 1   | 1   | 0   | 0   | 2    | 0   | 0   |
| ?   | ?   | 0   | ?   | 2   | ?   | ?   | ?   | ?   | 1   | ?   | ?   | ?   | ?    | ?   | ?   |
| ?   | ?   | 0   | ?   | 2   | 0   | ?   | ?   | ?   | 1   | 1   | ?   | ?   | ?    | ?   | ?   |
| ?   | ?   | ?   | ?   | ?   | ?   | ?   | ?   | ?   | ?   | ?   | ?   | ?   | ?    | ?   | ?   |
| ?   | ?   | 0   | ?   | 2   | 0   | 1   | ?   | 1   | 1   | ?   | ?   | ?   | ?    | 0   | ?   |
| ?   | ?   | 0   | ?   | 2   | 0   | ?   | ?   | ?   | 1   | ?   | 0   | ?   | ?    | 0   | 0   |
| ?   | ?   | 0   | 1   | 2   | 0   | 1   | ?   | 1   | 1   | 1   | 0   | 0   | 2    | 0   | 0   |
| ?   | ?   | 1   | 1   | 2   | 0   | 1   | ?   | 1   | 2   | 2   | 0   | 0   | 2    | 0   | 0   |
| ?   | ?   | 1   | 1   | 2   | 0   | 1   | ?   | 1   | 2   | 2   | 0   | 0   | 2    | 0   | 0   |
| ?   | ?   | ?   | ?   | ?   | ?   | ?   | ?   | ?   | ?   | ?   | ?   | ?   | ?    | ?   | ?   |
| 1   | 1   | 0   | 1   | 2   | 0   | 0   | 0   | 1   | 1   | 1   | ?   | 0   | 0    | 1   | 1   |
| 1   | 1   | 0   | 1   | 2   | 0   | 0   | 0   | 1   | 1   | 1   | 1   | 0   | 1    | 1   | 1   |
| ?   | ?   | 0   | ?   | 2   | 1   | ?   | ?   | ?   | 1   | ?   | ?   | ?   | ?    | ?   | ?   |
| 1   | 1   | 0   | 1   | 2   | 0   | 1   | ?   | 1   | 1   | 1   | 1   | 0   | 1    | 1   | 1   |
| 1   | 1   | 0   | 1   | 2   | 1   | ?   | ?   | 1   | 1   | 1   | 1   | 1   | 1    | 1   | 1   |
| 1   | 1   | 0   | 1   | 2   | 1   | ?   | ?   | 1   | 1   | 1   | 1   | 1   | 1    | 1   | 1   |
| 1   | 1   | 0   | 1   | 2   | 1   | ?   | ?   | 1   | 1   | 1   | 1   | 1   | 1    | 1   | 1   |
| 1   | 1   | 0   | 1   | 2   | 1   | ?   | ?   | 1   | 1   | 1   | 1   | 1   | 1    | 1   | 1   |

•

| 140 | 141 | 142 | 143 | 144 | 145 | 146 | 147 | 148 | 149 | 150 | 151 | 152 | 153 | 154 | 155 |
|-----|-----|-----|-----|-----|-----|-----|-----|-----|-----|-----|-----|-----|-----|-----|-----|
| ?   | 0   | 0   | 0   | 0   | 0   | 0   | ?   | 0   | 0   | 0   | 0   | 0   | 0   | 0   | 0   |
| ?   | ?   | ?   | ?   | ?   | ?   | ?   | ?   | ?   | ?   | ?   | ?   | ?   | ?   | 0   | 0   |
| ?   | ?   | ?   | 0   | 0   | 0   | ?   | ?   | ?   | ?   | ?   | ?   | ?   | ?   | 0   | 0   |
| 0   | 1   | 1   | 1   | ?   | ?   | 1   | 1   | ?   | 1   | ?   | ?   | ?   | ?   | 0   | 0   |
| 0   | 0   | 0   | 0   | 0   | 0   | 1   | 1   | 2   | 1   | 0   | 1   | 1   | 0   | 0   | 0   |
| ?   | ?   | ?   | 0   | ?   | ?   | ?   | 1   | 2   | 1   | 0   | 1   | 1   | 1   | 1   | 1   |
| ?   | ?   | ?   | 0   | ?   | ?   | ?   | 1   | 2   | 1   | 1   | 1   | 1   | 1   | 1   | 1   |
| ?   | ?   | ?   | ?   | ?   | ?   | ?   | ?   | ?   | ?   | ?   | 1   | 1   | 1   | ?   | ?   |
| ?   | 0   | 1   | 0   | ?   | ?   | 1   | ?   | ?   | ?   | ?   | 1   | 1   | 1   | ?   | ?   |
| 0   | ?   | 1   | 0   | 1   | 1   | ?   | 1   | 2   | 1   | 1   | 1   | 1   | 1   | 1   | 1   |
| 1   | 0   | 1   | 0   | 1   | 1   | ?   | 1   | 2   | 1   | 1   | 1   | 1   | 1   | 1   | 1   |
| 0   | 0   | 1   | 0   | 1   | 1   | 1   | 1   | 2   | 1   | 2   | 1   | 1   | 1   | 2   | 1   |
| 0   | 0   | 1   | 0   | 1   | 1   | ?   | 1   | 2   | 1   | 2   | 1   | 1   | 1   | 2   | 1   |
| ?   | ?   | ?   | ?   | ?   | ?   | ?   | 1   | 2   | ?   | 2   | 1   | 1   | 1   | 2   | 1   |
| 0   | 0   | ?   | 0   | ?   | ?   | 1   | 1   | 2   | 1   | 0   | 1   | 1   | ?   | 0   | 0   |
| 0   | 1   | 1   | 0   | 1   | 1   | ?   | 1   | 2   | 1   | 0   | 1   | 1   | 1   | 0   | 0   |
| ?   | ?   | 1   | 1   | ?   | ?   | ?   | 1   | ?   | 1   | ?   | ?   | ?   | 1   | ?   | ?   |
| 0   | 1   | 1   | 1   | 1   | 1   | 1   | 1   | 2   | 1   | 0   | 1   | 1   | 1   | 0   | 0   |
| 1   | 1   | 1   | 1   | 1   | 1   | 1   | 1   | 2   | 1   | 0   | 1   | 1   | 1   | 0   | 0   |
| 0   | 1   | 1   | 1   | 1   | 1   | 1   | 1   | 2   | 1   | 0   | 1   | 1   | 1   | 0   | 0   |
| 1   | 1   | 1   | 1   | 1   | 1   | 1   | 1   | 2   | 1   | 0   | 1   | 1   | 1   | 0   | 0   |
| 1   | 1   | 1   | 1   | 1   | 1   | 1   | 1   | 2   | 1   | 0   | 1   | 1   | 1   | 0   | 0   |

| 156 | 157  | 158 | 159 | 160 | 161  | 162 | 163 | 164 | 165 | 166 | 167 | 168 | 169 | 170 | 171 |
|-----|------|-----|-----|-----|------|-----|-----|-----|-----|-----|-----|-----|-----|-----|-----|
| 0   | 0    | ?   | 0   | 0   | ?    | 0   | 0   | 0   | 0   | 0   | 0   | 0   | 0   | 0   | 0   |
| 0   | ?    | ?   | ?   | ?   | ?    | ?   | 0   | ?   | 0   | ?   | 0   | 0   | 0   | 0   | 0   |
| 0   | ?    | 0   | 1   | 0   | 0    | 0   | 0   | ?   | 0   | ?   | 0   | 0   | 0   | 0   | 0   |
| 0   | ?    | 0   | ?   | ?   | ?    | 0   | 1   | 0   | 0   | ?   | 0   | 0   | 0   | 0   | 0   |
| 0   | 1    | 0   | 1   | 0   | 1    | 0   | 1   | 0   | 0   | 1   | 0   | 0   | 0   | 0   | 0   |
| 0   | [01] | 0   | 1   | 1   | 0    | 0   | 1   | 0   | 1   | 1   | 0   | 0   | 0   | 0   | ?   |
| 0   | 0    | 1   | 2   | 1   | 0    | 0   | 1   | 0   | 1   | 1   | 0   | 0   | 0   | 0   | 1   |
| ?   | ?    | ?   | ?   | ?   | ?    | ?   | 1   | 0   | 1   | 1   | 1   | 0   | 0   | 0   | ?   |
| ?   | ?    | ?   | ?   | ?   | ?    | ?   | 1   | 0   | 1   | 1   | 1   | 0   | 0   | 0   | ?   |
| 0   | 0    | 1   | 2   | 1   | 0    | 1   | 1   | 0   | 1   | 1   | 1   | 0   | 0   | 0   | 1   |
| 0   | 0    | 1   | 2   | 1   | 1    | 1   | 1   | 0   | 1   | 1   | 1   | 0   | 0   | 1   | 1   |
| 1   | 1    | 1   | 2   | 1   | [02] | 2   | 2   | 1   | 1   | 1   | 1   | 0   | 0   | 1   | 2   |
| 1   | 1    | 1   | 2   | 1   | [01] | 2   | 2   | 1   | 0   | 1   | 1   | 1   | 1   | 1   | 2   |
| 1   | 1    | 1   | 2   | 1   | ?    | 2   | 2   | 1   | 0   | 1   | 1   | 1   | 1   | 1   | 2   |
| 0   | ?    | 0   | 2   | 0   | 1    | 0   | 1   | 0   | 0   | 1   | 0   | 0   | 0   | 0   | 0   |
| 0   | 1    | 1   | 2   | 1   | 1    | 0   | 1   | 0   | 0   | 1   | 0   | 0   | 0   | 0   | 0   |
| ?   | ?    | 0   | ?   | 1   | 0    | ?   | ?   | ?   | ?   | ?   | ?   | 0   | 0   | ?   | ?   |
| 0   | ?    | 1   | 2   | 1   | 1    | 0   | 1   | 0   | 0   | 1   | 0   | 0   | 0   | 0   | 0   |
| 0   | 1    | 0   | 2   | 1   | 0    | 0   | 1   | 0   | 0   | 1   | 0   | 0   | 0   | 0   | 0   |
| 0   | 1    | 0   | 2   | 1   | 0    | 0   | 1   | 0   | 0   | 1   | 0   | 0   | 0   | 0   | 0   |
| 0   | 1    | 1   | 2   | 1   | 1    | 0   | 1   | 0   | 0   | 1   | 0   | 0   | 0   | 0   | 0   |
| 0   | ?    | 1   | 2   | 1   | 1    | 0   | 1   | 0   | 0   | 1   | 0   | 0   | 0   | 0   | 0   |

| 172 | 173 | 174 | 175 | 176 | 177 | 178 | 179 | 180  | 181 | 182 | 183 | 184 | 185 | 186 | 187 |
|-----|-----|-----|-----|-----|-----|-----|-----|------|-----|-----|-----|-----|-----|-----|-----|
| 0   | ?   | ?   | 0   | ?   | 0   | 0   | 0   | ?    | ?   | ?   | 0   | 2   | 0   | 0   | 0   |
| 0   | ?   | ?   | 0   | ?   | ?   | ?   | ?   | ?    | ?   | ?   | ?   | 2   | 0   | ?   | ?   |
| 0   | ?   | ?   | 0   | ?   | ?   | ?   | 0   | ?    | ?   | ?   | 0   | 2   | 0   | 0   | ?   |
| 0   | ?   | ?   | ?   | ?   | 0   | 2   | ?   | ?    | ?   | ?   | ?   | ?   | ?   | 0   | 1   |
| 0   | ?   | ?   | 1   | 0   | 0   | 2   | 1   | 0    | 0   | 0   | 0   | 2   | 0   | 1   | 1   |
| ?   | ?   | ?   | 1   | 0   | 0   | 2   | 1   | 1    | 0   | 0   | 0   | ?   | ?   | 1   | 1   |
| 1   | ?   | ?   | 1   | 0   | 0   | 2   | 1   | [12] | 0   | 0   | 0   | ?   | ?   | 1   | 1   |
| ?   | ?   | ?   | ?   | ?   | ?   | ?   | ?   | ?    | ?   | ?   | ?   | ?   | ?   | ?   | ?   |
| ?   | ?   | ?   | 1   | ?   | 0   | 2   | 1   | ?    | 0   | 0   | 0   | 1   | 0   | 1   | 1   |
| 1   | 0   | 0   | 1   | 0   | 0   | 2   | 1   | 2    | 0   | 0   | 0   | 1   | 0   | 1   | 1   |
| 1   | 0   | 0   | 1   | 0   | 0   | 2   | 1   | 2    | 0   | 0   | 0   | 1   | 0   | 1   | 1   |
| 2   | 0   | 1   | 2   | 1   | 1   | 2   | 1   | 0    | 1   | 0   | 1   | 0   | 1   | 1   | 1   |
| 2   | 1   | 1   | 2   | 1   | 1   | 2   | 1   | 0    | 1   | 1   | 1   | 0   | 1   | 1   | 1   |
| 2   | 1   | 1   | 2   | 1   | 1   | 2   | 1   | 0    | 1   | ?   | 1   | 0   | 1   | 1   | 1   |
| 0   | ?   | ?   | 0   | 0   | 0   | 2   | 1   | ?    | ?   | 0   | ?   | 2   | 0   | 1   | 1   |
| 0   | ?   | ?   | 0   | 0   | 0   | 2   | 1   | 0    | 0   | 2   | 0   | 2   | 0   | 1   | 1   |
| 0   | ?   | ?   | ?   | ?   | ?   | 2   | 1   | ?    | 0   | ?   | 0   | ?   | ?   | 2   | ?   |
| 0   | ?   | ?   | 0   | 0   | 0   | 2   | 1   | 0    | 0   | 2   | 0   | 2   | 0   | 2   | 1   |
| 0   | ?   | ?   | 0   | 0   | 0   | 2   | 1   | 0    | 0   | 2   | 0   | 2   | 0   | 2   | 1   |
| 0   | ?   | ?   | 0   | 0   | 0   | 2   | 1   | 1    | 0   | 2   | 0   | 2   | 0   | 2   | 1   |
| 0   | ?   | ?   | 0   | 0   | 0   | 2   | 1   | 0    | 0   | 2   | 0   | 2   | 0   | 2   | 1   |
| 0   | ?   | ?   | 0   | 0   | 0   | 2   | 1   | 0    | 0   | 2   | 0   | 2   | 0   | 2   | 1   |

| 188 | 189 | 190 | 191 | 192 | 193 | 194 | 195 | 196 | 197 | 198 | 199 | 200 | 201 | 202 | 203 |
|-----|-----|-----|-----|-----|-----|-----|-----|-----|-----|-----|-----|-----|-----|-----|-----|
| ?   | 0   | 0   | 1   | 0   | 0   | 0   | 0   | 0   | ?   | 0   | 0   | 0   | 1   | 0   | 0   |
| ?   | ?   | ?   | 1   | ?   | ?   | 0   | 0   | ?   | ?   | ?   | ?   | ?   | ?   | 1   | ?   |
| 0   | ?   | ?   | 1   | 0   | 0   | 0   | 0   | ?   | ?   | ?   | ?   | 1   | 1   | 1   | ?   |
| 2   | 0   | 2   | 1   | 0   | 0   | ?   | 0   | 1   | 0   | 0   | ?   | 1   | ?   | 2   | 1   |
| 1   | 0   | 2   | 0   | 0   | 0   | 0   | 1   | 1   | 1   | 0   | 0   | 1   | 1   | 2   | 1   |
| 1   | 0   | 2   | 0   | 1   | 0   | ?   | 1   | 1   | 1   | 0   | 0   | ?   | ?   | 2   | 1   |
| 1   | 0   | 2   | 0   | 1   | 0   | 1   | 1   | 1   | 1   | 0   | 0   | ?   | 1   | 2   | 1   |
| ?   | ?   | ?   | ?   | ?   | ?   | ?   | ?   | ?   | ?   | ?   | ?   | ?   | ?   | ?   | ?   |
| 1   | ?   | 2   | 0   | 1   | 1   | 1   | 1   | 1   | 2   | ?   | 0   | 1   | 0   | 2   | 1   |
| 1   | 0   | 2   | 0   | 1   | 1   | 1   | 1   | 1   | 2   | 0   | 0   | 1   | 0   | 2   | 1   |
| 1   | 1   | 2   | 0   | 1   | 1   | 1   | 1   | 1   | 2   | 0   | 0   | 1   | 0   | 2   | 1   |
| 1   | 1   | 2   | 0   | 1   | 1   | 1   | 1   | 2   | 2   | 1   | 0   | 1   | 0   | 2   | 1   |
| 1   | 1   | 2   | 0   | 1   | 1   | 1   | 1   | 2   | 2   | 1   | 1   | 1   | 0   | 2   | 1   |
| 1   | 1   | 2   | 0   | 1   | 1   | 1   | 1   | 2   | 2   | 1   | 1   | 1   | 0   | 2   | 1   |
| 1   | 0   | 2   | 0   | 1   | 1   | ?   | 1   | 1   | 2   | 0   | 0   | 1   | 1   | 2   | 1   |
| 0   | ?   | 2   | 0   | 0   | ?   | 0   | 1   | 1   | 2   | ?   | 0   | 1   | ?   | 2   | 1   |
| 1   | ?   | ?   | ?   | ?   | 1   | ?   | ?   | 1   | ?   | ?   | ?   | ?   | ?   | ?   | 1   |
| 1   | ?   | 2   | 0   | 0   | 1   | 0   | 1   | 1   | 2   | 2   | 0   | 1   | 1   | 2   | 1   |
| 2   | ?   | 2   | 0   | 0   | 1   | 0   | 1   | 1   | 2   | 2   | 0   | 1   | 1   | 2   | 1   |
| 1   | 1   | 2   | 0   | 0   | 1   | 0   | 1   | 1   | 2   | 2   | 0   | 1   | 1   | 2   | 1   |
| 1   | 1   | 2   | 0   | 0   | 1   | 0   | 1   | 1   | 2   | 2   | 0   | 1   | 1   | 2   | 1   |
| 1   | ?   | 2   | 0   | 0   | 1   | 0   | 1   | 1   | 2   | 2   | 0   | 1   | 1   | 2   | 1   |

| 204 | 205 | 206  | 207 | 208 | 209 | 210 | 211 | 212 | 213 | 214 | 215 | 216 | 217 | 218 | 219 |
|-----|-----|------|-----|-----|-----|-----|-----|-----|-----|-----|-----|-----|-----|-----|-----|
| 0   | 0   | 0    | 0   | 0   | 0   | 0   | 0   | ?   | 1   | 0   | 0   | 0   | ?   | 0   | 0   |
| ?   | ?   | ?    | ?   | 0   | 0   | 0   | 0   | ?   | ?   | 0   | 0   | 1   | ?   | ?   | 0   |
| 0   | ?   | 1    | ?   | 0   | 0   | 0   | 0   | ?   | ?   | 0   | 0   | 1   | ?   | ?   | 0   |
| 1   | 1   | 1    | ?   | 1   | 1   | ?   | 2   | 0   | 1   | 0   | 0   | 0   | 0   | 1   | 0   |
| 1   | 1   | 1    | 1   | 1   | 1   | 1   | 2   | 1   | 0   | 0   | 1   | 0   | 0   | 1   | 0   |
| 1   | 1   | 2    | 0   | ?   | ?   | ?   | 2   | 1   | 0   | 2   | 1   | 0   | ?   | ?   | 0   |
| 1   | 0   | 2    | 0   | 1   | 2   | ?   | 2   | 1   | 0   | 1   | 1   | 0   | 0   | 0   | 0   |
| ?   | ?   | ?    | ?   | ?   | ?   | ?   | ?   | ?   | ?   | ?   | ?   | ?   | ?   | ?   | ?   |
| 1   | 0   | 2    | 0   | 1   | ?   | ?   | 2   | 1   | 0   | 1   | 1   | 0   | 0   | 1   | 0   |
| 1   | 0   | ?    | 0   | 1   | 2   | 1   | 2   | 1   | ?   | 1   | 1   | 0   | 0   | 0   | 0   |
| 1   | 0   | 2    | 0   | 1   | 2   | ?   | 2   | 1   | 0   | 2   | 1   | 0   | 0   | 1   | 0   |
| 1   | 0   | 2    | 0   | 1   | 2   | 1   | 2   | 2   | 0   | 2   | 1   | 2   | 0   | 1   | 1   |
| 1   | 0   | 2    | 0   | 2   | 2   | 1   | 2   | 2   | 0   | 3   | 1   | 2   | 0   | 1   | 1   |
| 1   | 0   | 2    | 0   | 2   | 2   | 1   | 2   | 2   | 0   | 3   | 1   | 2   | 0   | 1   | 1   |
| 1   | 1   | 2    | 2   | 1   | 1   | ?   | 2   | 1   | 0   | 0   | 0   | 0   | 0   | 1   | 0   |
| 1   | 2   | 2    | 2   | 2   | 1   | 2   | 2   | 1   | 0   | 0   | 0   | 0   | 1   | 1   | 0   |
| ?   | 4   | [12] | ?   | 2   | ?   | ?   | ?   | ?   | ?   | ?   | ?   | ?   | ?   | ?   | ?   |
| 1   | 2   | 2    | 2   | 2   | 1   | 2   | 2   | 1   | 0   | 0   | 0   | 0   | 1   | 1   | 0   |
| 1   | 2   | 2    | 2   | 2   | 1   | 2   | 2   | 1   | 0   | 0   | 0   | 0   | 1   | 1   | 0   |
| 1   | 4   | 2    | 2   | 2   | 1   | 2   | 2   | 1   | 0   | 0   | 0   | 0   | 1   | 1   | 0   |
| 1   | 3   | 2    | 2   | 2   | 1   | 2   | 2   | 1   | 0   | 0   | 0   | 0   | 1   | 1   | 0   |
| 1   | 3   | 2    | 2   | 2   | 1   | 2   | 2   | 1   | 0   | 0   | 0   | 0   | 1   | 1   | 0   |

•

| 220 | 221 | 222 | 223 | 224 | 225 | 226 | 227 | 228 | 229 | 230 | 231 | 232 | 233 | 234 | 235 |
|-----|-----|-----|-----|-----|-----|-----|-----|-----|-----|-----|-----|-----|-----|-----|-----|
| 0   | 0   | 0   | 0   | 0   | 0   | 0   | 0   | 0   | 0   | 0   | 0   | ?   | 0   | 0   | 0   |
| 0   | ?   | ?   | ?   | ?   | 0   | 0   | ?   | ?   | 0   | 0   | ?   | ?   | 0   | 0   | ?   |
| 0   | ?   | ?   | ?   | ?   | 0   | 0   | ?   | ?   | 0   | 0   | ?   | ?   | 0   | 0   | ?   |
| 0   | 0   | 0   | 0   | 1   | 1   | 0   | 1   | 0   | 1   | 0   | 0   | 1   | 0   | 1   | 0   |
| 0   | 0   | 0   | 0   | 0   | 1   | 0   | 2   | 0   | 1   | 0   | 0   | 1   | 0   | 1   | 0   |
| 0   | 0   | ?   | 0   | ?   | 1   | ?   | 2   | 1   | 1   | 1   | 0   | ?   | 1   | 1   | 0   |
| 0   | 0   | 1   | 0   | 1   | 1   | 1   | 2   | 1   | 1   | 1   | 0   | 0   | 1   | 1   | 0   |
| ?   | ?   | ?   | ?   | ?   | ?   | ?   | ?   | ?   | ?   | ?   | ?   | ?   | ?   | ?   | ?   |
| 1   | ?   | 2   | 1   | 1   | 1   | 1   | 2   | 1   | 1   | 1   | 0   | 0   | 1   | 1   | 0   |
| 1   | 0   | 0   | 1   | 1   | 1   | 1   | 2   | 2   | 1   | 1   | 0   | 0   | 1   | 1   | 0   |
| 1   | 1   | 0   | 1   | 1   | 1   | 1   | 2   | 2   | 1   | 1   | 0   | 0   | 1   | 2   | 0   |
| 1   | 1   | 0   | 1   | 1   | 1   | 1   | 2   | 2   | 2   | 2   | 1   | 1   | 2   | 2   | 1   |
| 1   | 2   | 0   | 1   | 1   | 1   | 1   | 2   | 2   | 2   | 2   | 1   | 1   | 2   | 2   | 1   |
| 1   | 1   | 0   | 1   | 1   | 1   | 1   | 2   | 2   | 2   | 2   | 1   | 1   | 2   | 2   | 1   |
| 0   | 0   | 0   | 0   | ?   | 1   | 0   | 0   | 0   | 1   | 0   | ?   | ?   | 0   | 1   | 0   |
| 0   | 0   | 0   | 0   | 0   | 1   | 0   | 1   | 0   | 1   | 0   | 0   | ?   | 0   | 1   | 0   |
| ?   | ?   | 0   | 0   | ?   | ?   | ?   | ?   | ?   | ?   | ?   | ?   | ?   | ?   | ?   | ?   |
| 0   | 0   | 0   | 0   | 0   | 1   | 0   | 1   | 0   | 1   | 0   | 0   | 1   | 0   | 1   | 0   |
| 0   | 0   | 0   | 0   | 0   | 1   | 0   | 1   | 0   | 1   | 0   | 0   | 1   | 0   | 1   | 0   |
| 0   | 0   | 0   | 0   | 0   | 1   | 0   | 1   | 0   | 1   | 0   | 0   | 1   | 0   | 1   | 0   |
| 0   | 0   | 0   | 0   | 0   | 1   | 0   | 1   | 0   | 1   | 0   | 0   | 1   | 0   | 1   | 0   |
| 0   | 0   | 0   | 0   | 0   | 1   | 0   | 1   | 0   | 1   | 0   | 0   | 1   | 0   | 1   | 0   |

| 236 | 237 | 238 | 239 |
|-----|-----|-----|-----|
| 0   | 0   | ?   | 0   |
| 0   | 0   | ?   | 0   |
| 0   | 0   | ?   | 0   |
| 0   | 0   | 0   | 0   |
| 0   | 0   | 0   | 0   |
| 0   | 0   | ?   | ?   |
| 0   | 0   | 0   | 0   |
| ?   | ?   | ?   | ?   |
| 0   | 0   | ?   | ?   |
| 0   | 0   | 0   | 0   |
| 0   | 0   | 0   | 0   |
| 1   | 1   | 1   | 1   |
| 1   | 1   | 1   | 1   |
| 1   | 1   | 1   | 1   |
| ?   | ?   | ?   | 0   |
| 0   | 0   | 0   | 0   |
| ?   | ?   | ?   | ?   |
| 0   | 0   | 0   | 0   |
| 0   | 0   | 0   | 0   |
| 0   | 0   | 0   | 0   |
| 0   | 0   | 0   | 0   |
| 0   | 0   | 0   | 0   |
