# Supplementary material
Source: publisher figshare collection journal article supplement (https://tandf.figshare.com/articles/dataset/_/5281297)
Supplement: Supplementary file 3 [file 1]

## Supplementary Appendix 6

Synapomorphy list. Branch numbers correspond to that of Supplemental appendix 7.

*Archaeopteryx\_lithographica* :

No autapomorphies

*Protopteryx\_fengningensis* :

No autapomorphies

*Pengornis\_houi* :

No autapomorphies

*Apsaravis\_ukhaana* :

Char. 4: 0 --> 1

Char. 23: 0 --> 1

Char. 33: 0 --> 2

Char. 62: 0 --> 1

Char. 64: 0 --> 1

Char. 95: 0 --> 1

Char. 130: 0 --> 1

Char. 139: 0 --> 1

Char. 141: 0 --> 1

Char. 143: 0 --> 1

Char. 188: 1 --> 2

Char. 224: 0 --> 1

*Gansus\_yumenensis* :

Char. 88: 1 --> 2

Char. 207: 0 --> 1

*Enaliornis* :

Char. 214: 1 --> 2

*Pasquiaornis* :

Char. 87: 0 --> 1

Char. 218: 1 --> 0

Char. 222: 0 --> 1

*Chupkaornis\_keraorum* :

No autapomorphies

*Brodavis* :

Char. 222: 0 --> 2

Baptornis\_advenus :

Char. 218: 1 --> 0

Fumicollis\_hoffmani :

Char. 140: 0 --> 1

Char. 161: 0 --> 1

Paraesperornis\_alexi :

No autapomorphies

Hesperornis\_regalis :

Char. 221: 1 --> 2

Hesperornis\_gracilis :

No autapomorphies

Ichthyornis\_dispar :

Char. 24: 0 --> 2

Char. 26: 2 --> 0

Char. 43: 1 --> 2

Char. 51: 1 --> 2

Char. 63: 0 --> 1

Char. 137: 1 --> 0

Lithornis :

Char. 51: 1 --> 2

Char. 64: 0 --> 1

Char. 188: 1 --> 0

Vegavis\_iaai :

Char. 75: 1 --> 0

Char. 91: 1 --> 0

Crypturellus\_undulatus :

Char. 35: 0 --> 1

Char. 84: 0 --> 1

Char. 130: 0 --> 1

Chauna\_torquata :

Char. 46: 2 --> 1

Char. 52: 3 --> 4

Char. 53: 1 --> 0

Char. 63: 0 --> 1

Char. 74: 2 --> 1

Char. 80: 1 --> 2

Char. 188: 1 --> 2

Anas\_platyrhynchos :

No autapomorphies

Gallus\_gallus :

No autapomorphies

Phasianus\_colchicus :

No autapomorphies

Enantiornithes:

Char. 54: 0 --> 2

Char. 88: 1 --> 0

Char. 216: 0 --> 1

Node 24 :

No synapomorphies

Ornithuromorpha :

Char. 29: 1 --> 2

Char. 32: 0 --> 1

Char. 37: 1 --> 4

Char. 48: 2 --> 3

Char. 61: 0 --> 1

Char. 81: 0 --> 1

Char. 82: 0 --> 1

Char. 107: 0 --> 1

Char. 113: 1 --> 23

Char. 115: 0 --> 2

Char. 123: 0 --> 1

Char. 124: 0 --> 1

Char. 125: 0 --> 1

Char. 128: 0 --> 2

Char. 163: 0 --> 1

Char. 202: 1 --> 2

Char. 204: 0 --> 1

Char. 208: 0 --> 1

Char. 209: 0 --> 1

Char. 211: 0 --> 2

Char. 225: 0 --> 1

Char. 229: 0 --> 1

Char. 234: 0 --> 1

Node 26 :

Char. 57: 0 --> 1

Char. 65: 0 --> 1

Char. 73: 0 --> 1

Char. 76: 0 --> 1

Char. 93: 1 --> 0

Char. 96: 1 --> 0

Char. 99: 0 --> 1

Char. 101: 0 --> 1

Char. 108: 0 --> 1

Char. 134: 0 --> 1

Char. 186: 0 --> 1

Char. 191: 1 --> 0

Char. 195: 0 --> 1

Char. 213: 1 --> 0

Hesperornithiformes:

Char. 30: 0 --> 1

Char. 154: 0 --> 1

Char. 155: 0 --> 1

Char. 165: 0 --> 1

Char. 214: 0 --> 1

Char. 228: 0 --> 1

Char. 230: 0 --> 1

Char. 233: 0 --> 1

Node 28 :

Char. 27: 0 --> 1

Char. 28: 0 --> 1

Char. 29: 2 --> 3

Char. 37: 4 --> 5

Char. 144: 0 --> 1

Char. 145: 0 --> 1

Char. 153: 0 --> 1

Char. 206: 1 --> 2

Node 29 :

Char. 150: 0 --> 1

Char. 158: 0 --> 1

Char. 205: 1 --> 0

Node 30 :

Char. 30: 1 --> 2

Char. 167: 0 --> 1

Node 31 :

Char. 33: 0 --> 1

Node 32 :

Char. 228: 1 --> 2

Node 33 :

Char. 170: 0 --> 1

Char. 189: 0 --> 1

Char. 214: 1 --> 2

Char. 221: 0 --> 1

Char. 234: 1 --> 2

Hesperornithidae :

Char. 126: 0 --> 1

Char. 133: 1 --> 2

Char. 134: 1 --> 2

Char. 150: 1 --> 2

Char. 154: 1 --> 2

Char. 156: 0 --> 1

Char. 157: 0 --> 1

Char. 162: 1 --> 2

Char. 163: 1 --> 2

Char. 164: 0 --> 1

Char. 171: 1 --> 2

Char. 172: 1 --> 2

Char. 174: 0 --> 1

Char. 175: 1 --> 2

Char. 176: 0 --> 1

Char. 177: 0 --> 1

Char. 180: 2 --> 0

Char. 181: 0 --> 1

Char. 183: 0 --> 1

Char. 184: 1 --> 0

Char. 185: 0 --> 1  
Char. 196: 1 --> 2  
Char. 198: 0 --> 1  
Char. 212: 1 --> 2  
Char. 216: 0 --> 2  
Char. 219: 0 --> 1  
Char. 229: 1 --> 2  
Char. 230: 1 --> 2  
Char. 231: 0 --> 1  
Char. 232: 0 --> 1  
Char. 233: 1 --> 2  
Char. 235: 0 --> 1  
Char. 236: 0 --> 1  
Char. 237: 0 --> 1  
Char. 238: 0 --> 1  
Char. 239: 0 --> 1

Hesperornis :

Char. 165: 1 --> 0  
Char. 168: 0 --> 1  
Char. 169: 0 --> 1  
Char. 173: 0 --> 1  
Char. 199: 0 --> 1  
Char. 208: 1 --> 2  
Char. 214: 2 --> 3

Node 36 :

Char. 34: 0 --> 1  
Char. 62: 0 --> 1  
Char. 100: 1 --> 0  
Char. 103: 0 --> 1  
Char. 139: 0 --> 1  
Char. 193: 0 --> 1  
Char. 197: 1 --> 2  
Char. 207: 0 --> 2

Paleognathus :

Char. 11: 1 --> 0  
Char. 23: 0 --> 1

Char. 24: 0 --> 1

Char. 25: 0 --> 1

Char. 42: 0 --> 1

Neornithes :

Char. 3: 0 --> 1

Char. 4: 0 --> 1

Char. 5: 0 --> 1

Char. 9: 0 --> 1

Char. 17: 0 --> 1

Char. 20: 0 --> 1

Char. 30: 0 --> 2

Char. 33: 0 --> 2

Char. 36: 0 --> 1

Char. 37: 5 --> 6

Char. 39: 0 --> 1

Char. 50: 0 --> 1

Char. 69: 0 --> 1

Char. 87: 0 --> 1

Char. 91: 0 --> 1

Char. 109: 2 --> 1

Char. 141: 0 --> 1

Char. 182: 0 --> 2

Char. 198: 0 --> 2

Char. 205: 1 --> 2

Char. 208: 1 --> 2

Char. 217: 0 --> 1

Node 39 :

Char. 69: 1 --> 0

Char. 205: 2 --> 4

Node 40 :

Char. 52: 2 --> 3

Char. 62: 1 --> 0

Char. 122: 1 --> 0

Char. 161: 1 --> 0

Neognathus :

Char. 6: 1 --> 2

Char. 54: 0 --> 1  
Char. 70: 0 --> 1  
Char. 102: 0 --> 1  
Char. 129: 0 --> 1  
Char. 136: 0 --> 1

Node 42 :

Char. 35: 0 --> 1  
Char. 54: 1 --> 2  
Char. 84: 0 --> 1  
Char. 123: 1 --> 2  
Char. 205: 2 --> 3
