# Supplementary material
Source: publisher figshare collection journal article supplement (https://tandf.figshare.com/articles/dataset/_/5281297)
Supplement: Supplementary file 4 [file 1]

**Supplemental Appendix 4.** The specimens used :

| <b>Taxon</b>                       | <b>OUT</b>                         |
|------------------------------------|------------------------------------|
| <i>Archaeopteryx lithographica</i> | <i>Archaeopteryx_lithographica</i> |
| <i>Protopteryx fengningensis</i>   | <i>Protopteryx_fengningensis</i>   |
| <i>Pengornis houi</i>              | <i>Pengornis_houi</i>              |
| <i>Apsaravis ukhaana</i>           | <i>Apsaravis_ukhaana</i>           |
| <i>Gansus yumenensis</i>           | <i>Gansus_yumenensis</i>           |
| <i>Enaliornis sedgwicki</i>        | <i>Enaliornis</i>                  |
| <i>Enaliornis sedgwicki</i>        | <i>Enaliornis</i>                  |
| <i>Enaliornis sedgwicki</i>        | <i>Enaliornis</i>                  |
| <i>Enaliornis seeleyi</i>          | <i>Enaliornis</i>                  |
| <i>Enaliornis barretti</i>         | <i>Enaliornis</i>                  |
| <i>Pasquiaornis tankei</i>         | <i>Pasquiaornis</i>                |
| <i>Pasquiaornis hardiei</i>        | <i>Pasquiaornis</i>                |

|                               |                               |
|-------------------------------|-------------------------------|
| <i>Pasquiaornis hardiei</i>   | <i>Pasquiaornis</i>           |
| <i>Chupkaornis kerai</i>      | <i>Chupkaornis_keraorum</i>   |
| <i>Brodavis americanus</i>    | <i>Brodavis</i>               |
| <i>Brodavis bairdi</i>        | <i>Brodavis</i>               |
| <i>Brodavis varneri</i>       | <i>Brodavis</i>               |
| <i>Baptornis advenus</i>      | <i>Baptornis_advenus</i>      |
| <i>Baptornis advenus</i>      | <i>Baptornis_advenus</i>      |
| <i>Baptornis advenus</i>      | <i>Baptornis_advenus</i>      |
| <i>Fumicollis hoffmani</i>    | <i>Fumicollis_hoffmani</i>    |
| <i>Paraesperornis alexi</i>   | <i>Paraesperornis_alexi</i>   |
| <i>Paraesperornis alexi</i>   | <i>Paraesperornis_alexi</i>   |
| <i>Hesperornis regalis</i>    | <i>Hesperornis_regalis</i>    |
| <i>Hesperornis gracilis</i>   | <i>Hesperornis_gracilis</i>   |
| <i>Hesperornis gracilis</i>   | <i>Hesperornis_gracilis</i>   |
| <i>Hesperornis gracilis</i>   | <i>Hesperornis_gracilis</i>   |
| <i>Ichthyornis dispar</i>     | <i>Ichthyornis_dispar</i>     |
| <i>Lithornis</i>              | <i>Lithornis</i>              |
| <i>Crypturellus undulatus</i> | <i>Crypturellus_undulatus</i> |
| <i>Chauna torquata</i>        | <i>Chauna_torquata</i>        |
| <i>Vegavis iaai</i>           | <i>Vegavis_iaai</i>           |
| <i>Anas platyrhynchos</i>     | <i>Anas_platyrhynchos</i>     |
| <i>Gallus gallus</i>          | <i>Gallus_gallus</i>          |
| <i>Crax pauxi</i>             | <i>Crax_pauxi</i>             |

for coding are listed. The type specimens are indicated in bold. Anat

| Specimen ID                                                                                                                                                                                                                                                                                                                                                                                                                                                                                                                                       |
|---------------------------------------------------------------------------------------------------------------------------------------------------------------------------------------------------------------------------------------------------------------------------------------------------------------------------------------------------------------------------------------------------------------------------------------------------------------------------------------------------------------------------------------------------|
| NHMUK 37007; MB. 188081                                                                                                                                                                                                                                                                                                                                                                                                                                                                                                                           |
| <b>IVPP V11665</b>                                                                                                                                                                                                                                                                                                                                                                                                                                                                                                                                |
| <b>IVPP V15336</b>                                                                                                                                                                                                                                                                                                                                                                                                                                                                                                                                |
| <b>IGM 100/1017</b>                                                                                                                                                                                                                                                                                                                                                                                                                                                                                                                               |
| CAGS-04-CM-003<br>CAGS-04-CM-004<br>CAGS-06-CM-011<br>CAGS-07-CM-006<br>CAGS-05-CM-014<br>CAGS-07-CM-011<br>CAGS-07-CM-009<br>CAGS-04-CM-002<br>CAGS-04-CM-001<br>CAGS-04-CM-018<br>CAGS-04-CM-031                                                                                                                                                                                                                                                                                                                                                |
| NHMUK 479; CAMSM 55287, 55288, 55289, 55295, 55300, 55302, 55310<br>NHMUK 480; <b>CAMSM 55314</b> , 55315; YORYMG 581<br>NHMUK 41790; CAMSM 55320, 55332                                                                                                                                                                                                                                                                                                                                                                                          |
| CAMSM 55283<br>NHMUK 484, 5801; CAMSM 55290, 55293, 55307, 55299, 55307, 55308;<br>BGS 87935; NHMUK 478, 481; CAMSM 55317; YORYMG 587, 588<br>NHMUK 485a; CAMSM 55318, 55319, 55321; YORYMG 589                                                                                                                                                                                                                                                                                                                                                   |
| NHMUK 5308; YORYMG 507<br>CAMSM 55277<br>BGS 87936; NHMUK 5310; CAMSM 55282<br>NHMUK 163, 479, 482, 483, 5305, 5306, 5803, 5805, 41792; CAMSM 550<br>NHMUK 5304, 5307; CAMSM 55312, 55313, 55316; YORYMG 587<br><b>NHMUK 477</b> , 5309; BGS 87932; CAMSM 55331                                                                                                                                                                                                                                                                                   |
| RSM P2985.10, P2986.2, P2988.1, P2988.11, P2989.21, P2995.4, P2995.<br>RSM P2626.15, P2957.16, P2957.17, P2987.13, P2987.14, P2989.24, P29<br>RSM P2989.23, P2957.15, P2985.3, P2989.22<br>RSM P2997.62<br>RSM P2988.9<br>RSM P2997.58, 2997.59<br>RSM P2077.4, 2487.4, 2995.1, 2989.11<br>RSM P2831.4, 2989.34<br>RSM P2989.17, 2997.30<br>RSM P2626.27, 2997.56<br>RSM P2077.10, 2077.108, 2997.2, 2997.3<br>RSM P2957.22, 2957.21, 2997.44<br>RSM P2997.80<br><b>RSM P2077.63</b> , 2077.79, 2957.27<br>RSM P2989.27, 2989.41, 2997.68, 3015.9 |
| RSM P2831.18, P2831.6, P2957.12, P2985.9, P2989.19<br>RSM P2831.8<br>RSM P2626.18, P2989.25<br>RSM P2831.54                                                                                                                                                                                                                                                                                                                                                                                                                                       |

|                                         |
|-----------------------------------------|
| RSM P2985.8                             |
| RSM P2487.3, 2995.1, 2989.15            |
| RSM P2831.20                            |
| RSM P2077.59, 2077.60, 2487.3, 2997.4   |
| RSM P2995.1, 2997.42, 2997.46           |
| RSM P2988.21                            |
| <b>RSM P2077.117</b> , 2997.18, 2997.81 |
| <b>MCM.A773</b>                         |
| <b>RSM P2315.1</b>                      |
| <b>UNSM 50665</b>                       |
| <b>SDSM 68430</b>                       |
| AMNH 5101                               |
| FMNH 395                                |
| KUVP 2290                               |
| <b>UNSM 20030</b>                       |
| <b>KUVP 2287</b>                        |
| KUVP 24090                              |
| <b>YPM 1200</b>                         |
| YPM 1206                                |
| YPM 1476                                |
| KUVP 71012                              |
| FHSM VP-2069                            |
| UNSM 1212                               |
| <b>YPM 1473</b>                         |
| YPM 1478                                |
| YPM 1679                                |
| <b>YPM 1450</b>                         |
| YPM 1732                                |
| YPM 1733                                |
| YPM 1755                                |
| YPM 1773                                |
| YPM 1741                                |
| YPM 1724                                |
| YPM 1463                                |
| YPM 1739                                |
| YPM 1771                                |
| YPM 1796                                |
| multiple specimens                      |
| multiple specimens                      |
| multiple specimens                      |
| <b>MLP 93-I-3-1</b>                     |
| multiple specimens                      |
| multiple specimens                      |
| multiple specimens                      |

tomical abbreviations: cav, caudal vertebrae; cor, coracoid; crn, cranial elements; c

| Material                                         | Specimen Reference                         |
|--------------------------------------------------|--------------------------------------------|
| complete skeletons                               | Wellnhofer 2009                            |
| complete skeletons                               | Zhang & Zhou 2000                          |
| complete skeletons                               | Zhou et al. 2008                           |
| nearly complete skeletons without skull          | Norell & Clarke 2001; Clarke & Norell 2002 |
| nearly complete skeletons without skull          | You et al. 2006                            |
| cvt, tvt, rib, fur, cor, hum, uln, rad, cmc, mph | You et al. 2006                            |
| stn                                              | Wang et al. 2014                           |
| hum, uln, rad, cmc                               | Wang et al. 2014                           |
| hum, uln, rad, cmc, mph, fmr, tib, fib, tmt, pph | Wang et al. 2014                           |
| stn, plv, fmr, tbt, fib, tmt, pph                | Wang et al. 2014                           |
| plv                                              | Wang et al. 2014                           |
| cvt, tvt, plv, sys, cav, fmr, tbt, fib, tmt, pph | You et al. 2006                            |
| tbt, fib, tmt, pph                               | You et al. 2006                            |
| tbt                                              | Wang et al. 2014                           |
| tmt                                              | Wang et al. 2014                           |
| fmr                                              | Galton & Martin 2002a, b                   |
| tbt                                              | Galton & Martin 2002a, b                   |
| tmt                                              | Galton & Martin 2002a, b                   |
| plv                                              | Galton & Martin 2002a, b                   |
| fmr                                              | Galton & Martin 2002a, b                   |
| tbt                                              | Galton & Martin 2002a, b                   |
| tmt                                              | Galton & Martin 2002a, b                   |
| cvt                                              | Galton & Martin 2002a, b                   |
| tvt                                              | Galton & Martin 2002a, b                   |
| plv                                              | Galton & Martin 2002a, b                   |
| fmr                                              | Galton & Martin 2002a, b                   |
| tbt                                              | Galton & Martin 2002a, b                   |
| tmt                                              | Galton & Martin 2002a, b                   |
| crn                                              | Sanchez 2011                               |
| cvt                                              | Sanchez 2011                               |
| tvt                                              | Sanchez 2011                               |
| sys                                              | Sanchez 2011                               |
| cor                                              | Sanchez 2011                               |
| sca                                              | Sanchez 2011                               |
| hum                                              | Tokaryk et al. 1997; Sanchez 2011          |
| cmc                                              | Sanchez 2011                               |
| uln                                              | Sanchez 2011                               |
| plv                                              | Sanchez 2011                               |
| fmr                                              | Tokaryk et al. 1997; Sanchez 2011          |
| tbt                                              | Sanchez 2011                               |
| fib                                              | Sanchez 2011                               |
| tmt                                              | Tokaryk et al. 1997; Sanchez 2011          |
| pph                                              | Sanchez 2011                               |
| crn                                              | Sanchez 2011                               |
| cvt                                              | Sanchez 2011                               |
| sys                                              | Sanchez 2011                               |
| cor                                              | Sanchez 2011                               |

|                                                     |                                            |
|-----------------------------------------------------|--------------------------------------------|
| sca                                                 | Sanchez 2011                               |
| hum                                                 | Sanchez 2011                               |
| rad                                                 | Sanchez 2011                               |
| fmr                                                 | Tokaryk et al. 1997; Sanchez 2011          |
| tbt                                                 | Sanchez 2011                               |
| fib                                                 | Sanchez 2011                               |
| tmt                                                 | Tokaryk et al. 1997; Sanchez 2011          |
| cvt, tvf, fmr, fib                                  | Tanaka et al. 2017                         |
| tmt                                                 | Martin et al. 2012                         |
| tmt                                                 | Martin et al. 2012                         |
| cvt, tvf, plv, fmr, fib, tbt, tmt                   | Martin & Cordes-Person 2004; Martin et al. |
| cvt, tvf, cav, sys, plv, tbt, tmt                   | Martin & Tate 1976                         |
| crn, cvt, sys, fmr, tbt, tmt, pph                   | Martin & Tate 1976                         |
| cvt, tvf, sys, sca, cor, hum, uln, rad, fmr, pat,   | Martin & Tate 1976                         |
| cvt, tvf, cav, cor, stn, plv, fmr, fib, tbt, tmt, p | Martin & Tate 1976; Bell & Chiappe 2015b   |
| nearly complete skeletons                           | Martin 1988                                |
| cvt, tvf, cav, stn, sca, cor, fmr, tbt              | Bell 2013                                  |
| tvf, cav, fmr, tbt, pat, tmt, fib, pph              | Marsh 1880; Bell & Ciappe 2015a            |
| nearly complete skeletons                           | Marsh 1880; Bell & Ciappe 2015a            |
| stn, plv, fmr, pat, tbt, tmt, pph                   | Marsh 1880; Bell & Ciappe 2015a            |
| crn, cvt, tmt                                       | Buhler et al. 1988; Bell & Ciappe 2015a    |
| nearly complete skeletons                           | Bell & Ciappe 2015a                        |
| cvt, tvf, sys, plv, fmr, tmt                        | Everhart 2011                              |
| tmt                                                 | Marsh 1880; Bell & Ciappe 2015a            |
| cvt, tvf, fmr, tbt, tmt, pph                        | Marsh 1880; Bell & Ciappe 2015a            |
| rib, plv, fmr, pat, tbt, fib, tmt, pph              | Marsh 1880; Bell & Ciappe 2015a            |
| crn, stn, cor, scp, hum, uln, rad, cmc, plv, fmr    | Clarke 2004                                |
| tvf, plv                                            | Clarke 2004                                |
| cvt, cor                                            | Clarke 2004                                |
| fur                                                 | Clarke 2004                                |
| scp                                                 | Clarke 2004                                |
| rad                                                 | Clarke 2004                                |
| cmc                                                 | Clarke 2004                                |
| mph                                                 | Clarke 2004                                |
| tmt                                                 | Clarke 2004                                |
| tmt                                                 | Clarke 2004                                |
| tmt                                                 | Clarke 2004                                |
| nearly complete skeletons                           | Houde 1988                                 |
| complete skeletons                                  |                                            |
| complete skeletons                                  |                                            |
| cvt, tvf, sys, cor, sca, hum, uln, rad, plv, fmr,   | Clarke et al. 2005                         |
| complete skeletons                                  |                                            |
| complete skeletons                                  |                                            |
| complete skeletons                                  |                                            |

;mc, carpometacarpus; crn, cranial elements; cvt, cervical vertebrae; fib, fibula;

2012



fmr, femur; fur, furcula; hum, humerus; mph, manual phalanges; pat, patella;



plv, pelvis (any combination of the pubis, ilium and/or ischium); pph, pedal ph:



alanges; rad, radius; scp, scapula; stn, sternum; sys, synsacrum; tvt, thoracic ve



artebrae; tmt, tarsometatarsus; uln, ulna;
