# Supplementary material
Source: publisher figshare collection journal article supplement (https://tandf.figshare.com/articles/dataset/_/5281297)
Supplement: Supplementary file 5 [file 1]

## Supplemental Appendix 5

The specimens used for coding are listed. The type specimens are indicated in bold. Anatomical abbreviations: cav, caudal vertebrae; cor, coracoid; crn, cranial elements; cmc, carpometacarpus; crn, cranial elements; cvt, cervical vertebrae; fib, fibula; fmr, femur; fur, furcula; hum, humerus; mph, manual phalanges; pat, patella; plv, pelvis (any combination of the pubis, ilium and/or ischium); pph, pedal phalanges; rad, radius; scp, scapula; stn, sternum; sys, synsacrum; tvt, thoracic vertebrae; tmt, tarsometatarsus; uln, ulna.

| Taxon                              | Specimen ID                                                                                                       | Material                  |
|------------------------------------|-------------------------------------------------------------------------------------------------------------------|---------------------------|
| <i>Archaeopteryx lithographica</i> | NHMUK 37007; MB. 188081                                                                                           | complete skeletons        |
| <i>Protopteryx fengningensis</i>   | <b>IVPP V11665</b>                                                                                                | complete skeletons        |
| <i>Pengornis houi</i>              | <b>IVPP V15336</b>                                                                                                | complete skeletons        |
| <i>Apsaravis ukhaana</i>           | <b>IGM 100/1017</b>                                                                                               | nearly complete skeletons |
| <i>Gansus yumenensis</i>           | CAGS-04-CM-001, 04-CM-002, 04-CM-003, 04-CM-004, 04-CM-018, 04-CM-031, 05-CM-014, 07-CM-006, 07-CM-009, 07-CM-011 | nearly complete skeletons |
| <i>Enaliornis sedgwicki</i>        | NHMUK 479; CAMSM 55287, 55288, 55289, 55295, 55300, 55302, 55310                                                  | fmr                       |
| <i>Enaliornis sedgwicki</i>        | NHMUK 480; <b>CAMSM 55314</b> , 55315; YORYMG 581                                                                 | tbt                       |
| <i>Enaliornis sedgwicki</i>        | NHMUK 41790; CAMSM 55320, 55320, 55332                                                                            | tmt                       |
| <i>Enaliornis seeleyi</i>          | CAMSM 55283                                                                                                       | plv                       |

|                            |                                                                             |     |
|----------------------------|-----------------------------------------------------------------------------|-----|
| <i>Enaliornis seeleyi</i>  | NHMUK 484, 5801; CAMSM 55290, 55293, 55307, 55299, 55307, 55308; YORYMG 591 | fmr |
| <i>Enaliornis seeleyi</i>  | BGS 87935; NHMUK 478, 481; CAMSM 55317; YORYMG 587, 588                     | tbt |
| <i>Enaliornis seeleyi</i>  | NHMUK 485a; CAMSM 55318, 55319, 55321; YORYMG 589                           | tmt |
| <i>Enaliornis barretti</i> | NHMUK 5308; YORYMG 507                                                      | cvt |
| <i>Enaliornis barretti</i> | CAMSM 55277                                                                 | tvf |
| <i>Enaliornis barretti</i> | BGS 87936; NHMUK 5310; CAMSM 55282                                          | plv |
| <i>Enaliornis barretti</i> | NHMUK 163, 479, 482, 483, 5305, 5306, 5803, 5805, 41792; CAMSM 5506         | fmr |
| <i>Enaliornis barretti</i> | NHMUK 5304, 5307; CAMSM 55312, 55313, 55316; YORYMG 587                     | tbt |
| <i>Enaliornis barretti</i> | <b>NHMUK 477</b> , 5309; BGS 87932; CAMSM 55331                             | tmt |
| <i>Pasquiaornis tankei</i> | RSM P2985.10, P2986.2, P2988.1, P2988.11, P2989.21, P2995.4, P2995.5        | crn |
| <i>Pasquiaornis tankei</i> | RSM P2626.15, P2957.16, P2957.17, P2987.13, P2987.14, P2989.24, P2997.54    | cvt |
| <i>Pasquiaornis tankei</i> | RSM P2989.23, P2957.15, P2985.3, P2989.22                                   | tvf |
| <i>Pasquiaornis tankei</i> | RSM P2997.62                                                                | sys |
| <i>Pasquiaornis tankei</i> | RSM P2988.9                                                                 | cor |
| <i>Pasquiaornis tankei</i> | RSM P2997.58, 2997.59                                                       | sca |
| <i>Pasquiaornis tankei</i> | RSM P2077.4, 2487.4, 2995.1, 2989.11                                        | hum |

|                             |                                                    |     |
|-----------------------------|----------------------------------------------------|-----|
| <i>Pasquiaornis tankei</i>  | RSM P2831.4, 2989.34                               | cmc |
| <i>Pasquiaornis tankei</i>  | RSM P2989.17, 2997.30                              | uln |
| <i>Pasquiaornis tankei</i>  | RSM P2626.27, 2997.56                              | plv |
| <i>Pasquiaornis tankei</i>  | RSM P2077.10, 2077.108, 2997.2, 2997.3             | fmr |
| <i>Pasquiaornis tankei</i>  | RSM P2957.22, 2957.21, 2997.44                     | tbt |
| <i>Pasquiaornis tankei</i>  | RSM P2997.80                                       | fib |
| <i>Pasquiaornis tankei</i>  | <b>RSM P2077.63</b> , 2077.79, 2957.27             | tmt |
| <i>Pasquiaornis tankei</i>  | RSM P2989.27, 2989.41, 2997.68, 3015.9             | pph |
| <i>Pasquiaornis hardiei</i> | RSM P2831.18, P2831.6, P2957.12, P2985.9, P2989.19 | crn |
| <i>Pasquiaornis hardiei</i> | RSM P2831.8                                        | cvt |
| <i>Pasquiaornis hardiei</i> | RSM P2626.18, P2989.25                             | sys |
| <i>Pasquiaornis hardiei</i> | RSM P2831.54                                       | cor |
| <i>Pasquiaornis hardiei</i> | RSM P2985.8                                        | sca |
| <i>Pasquiaornis hardiei</i> | RSM P2487.3, 2995.1, 2989.15                       | hum |
| <i>Pasquiaornis hardiei</i> | RSM P2831.20                                       | rad |
| <i>Pasquiaornis hardiei</i> | RSM P2077.59, 2077.60, 2487.3, 2997.4              | fmr |
| <i>Pasquiaornis</i>         | RSM P2995.1, 2997.42, 2997.46                      | tbt |

|                                                                                                                      |                                                             |                                                                                                                                                       |
|----------------------------------------------------------------------------------------------------------------------|-------------------------------------------------------------|-------------------------------------------------------------------------------------------------------------------------------------------------------|
| <i>hardiei</i><br><i>Pasquiaornis</i><br><i>hardiei</i><br><i>Pasquiaornis</i><br><i>hardiei</i>                     | RSM P2988.21<br><br><b>RSM P2077.117</b> , 2997.18, 2997.81 | fib<br><br>tmt                                                                                                                                        |
| <i>Chupkaornis</i><br><i>keraorum</i>                                                                                | <b>MCM.A773</b>                                             | cvt, tvt, fmr, fib                                                                                                                                    |
| <i>Brodavis</i><br><i>americanus</i>                                                                                 | <b>RSM P2315.1</b>                                          | tmt                                                                                                                                                   |
| <i>Brodavis</i><br><i>bairdi</i>                                                                                     | <b>UNSM 50665</b>                                           | tmt                                                                                                                                                   |
| <i>Brodavis</i><br><i>varneri</i>                                                                                    | <b>SDSM 68430</b>                                           | cvt, tvt, fmr, fib,<br>tbt, tmt                                                                                                                       |
| <i>Baptornis</i><br><i>advenus</i><br><i>Baptornis</i><br><i>advenus</i><br><i>Baptornis</i><br><i>advenus</i>       | AMNH 5101<br><br>FMNH 395<br><br>KUPV 2290                  | cvt, tvt, cav, sys,<br>plv, tbt, tmt<br>crn, cvt, sys, fmr,<br>tbt, tmt, pph<br>cvt, tvt, sys, sca,<br>cor, hum, uln, rad,<br>fmr, pat, tbt, fib, tmt |
| <i>Fumicollis</i><br><i>hoffmani</i>                                                                                 | <b>UNSM 20030</b>                                           | cvt, tvt, cav, cor,<br>stn, plv, fmr, fib,<br>tbt, tmt, pph                                                                                           |
| <i>Parahesperornis</i><br><i>alexi</i><br><i>Parahesperornis</i><br><i>alexi</i>                                     | <b>KUPV 2287</b><br><br>KUPV 24090                          | nearly complete skeletons<br><br>cvt, tvt, cav, stn,<br>sca, cor, fmr, tbt                                                                            |
| <i>Hesperornis</i><br><i>regalis</i><br><i>Hesperornis</i><br><i>regalis</i><br><i>Hesperornis</i><br><i>regalis</i> | <b>YPM 1200</b><br><br>YPM 1206<br><br>YPM 1476             | vrt, fmr, tbt, pat,<br>tmt, fib, phx<br><br>nearly complete skeletons<br><br>vrt, stn, plv, fmr,<br>pat, tbt, tmt, phx                                |

|                             |                 |                                                                      |
|-----------------------------|-----------------|----------------------------------------------------------------------|
| <i>Hesperornis regalis</i>  | KUVP 71012      | crn, vrt, tmt                                                        |
| <i>Hesperornis regalis</i>  | FHSM VP-2069    | nearly complete skeletons                                            |
| <i>Hesperornis regalis</i>  | UNSM 1212       | cvt, tvt, sys, plv, fmr, tmt                                         |
| <i>Hesperornis gracilis</i> | <b>YPM 1473</b> | tmt                                                                  |
| <i>Hesperornis gracilis</i> | YPM 1478        | vrt, fmr, tbt, tmt, pph                                              |
| <i>Hesperornis gracilis</i> | YPM 1679        | rib, plv, fmr, pat, tbt, fib, tmt, pph                               |
| <i>Ichthyornis dispar</i>   | <b>YPM 1450</b> | crn, stn, cor, scp, hum, uln, rad, cmc, plv, fmr, tbt, fib, tmt, pph |
| <i>Ichthyornis dispar</i>   | YPM 1732        | tvt, plv                                                             |
| <i>Ichthyornis dispar</i>   | YPM 1733        | cvt, cor                                                             |
| <i>Ichthyornis dispar</i>   | YPM 1755        | fur                                                                  |
| <i>Ichthyornis dispar</i>   | YPM 1773        | scp                                                                  |
| <i>Ichthyornis dispar</i>   | YPM 1741        | rad                                                                  |
| <i>Ichthyornis dispar</i>   | YPM 1724        | cmc                                                                  |
| <i>Ichthyornis dispar</i>   | YPM 1463        | mph                                                                  |
| <i>Ichthyornis dispar</i>   | YPM 1739        | tmt                                                                  |
| <i>Ichthyornis dispar</i>   | YPM 1771        | tmt                                                                  |

|                                   |                     |                                                                  |
|-----------------------------------|---------------------|------------------------------------------------------------------|
| <i>Ichthyornis<br/>dispar</i>     | YPM 1796            | tmt                                                              |
| <i>Lithornis</i>                  | multiple specimens  | nearly complete skeletons                                        |
| <i>Crypturellus<br/>undulatus</i> | multiple specimens  | complete skeletons                                               |
| <i>Chauna<br/>torquata</i>        | multiple specimens  | complete skeletons                                               |
| <i>Vegavis<br/>iaai</i>           | <b>MLP 93-I-3-1</b> | cvt, tvf, sys, cor, sca,<br>hum, uln, rad, plv,<br>fmr, tbt, tmt |
| <i>Anas<br/>platyrhynchos</i>     | multiple specimens  | complete skeletons                                               |
| <i>Gallus<br/>gallus</i>          | multiple specimens  | complete skeletons                                               |
| <i>Phasianus<br/>colchicus</i>    | multiple specimens  | complete skeletons                                               |
