# Supplementary material
Source: publisher figshare collection journal article supplement (https://tandf.figshare.com/articles/dataset/_/5281297)
Supplement: Supplementary file 6 [file 1]

## Supplemental Appendix 1.

Measurements of vertebrae of *Chupkaornis keraorum* (in mm).

| Vertebrate                        | <i>Chupkaornis keraorum</i> |      |       |      |       |
|-----------------------------------|-----------------------------|------|-------|------|-------|
|                                   | C15                         | C16  | C17   | T3   | T4    |
| Length centrum                    | -                           | -    | -     | -    | 20.00 |
| Width anterior articulation       | 10.92                       | -    | 13.82 | -    | 14.70 |
| Height anterior articulation      | 4.11                        | -    | -     | -    | 7.29  |
| Width posterior articulation      | -                           | -    | -     | -    | 14.47 |
| Height posterior articulation     | -                           | -    | -     | -    | 9.01  |
| Diameter or rib articulation Head | -                           | -    | -     | 5.05 | 5.39  |
| Diameter of tuberculum            | -                           | -    | -     | 4.04 | 5.36  |
| Diameter of neural canal          | 6.45                        | 6.51 | 5.54  | -    | 5.31  |
| Height neural spine               | -                           | -    | 10.03 | 8.44 | -     |
| Length base neural spine          | -                           | 8.31 | 12.02 | -    | -     |
| Width across transverse process   | -                           | -    | -     | -    | -     |

|                                             |       |      |       |   |       |
|---------------------------------------------|-------|------|-------|---|-------|
| Transverse diameter across prezygapophysis  | 20.30 | -    | 13.98 | - | 14.30 |
| Transverse diameter across postzygapophysis | -     | -    | -     | - | -     |
| Diameter of prezygapophysis                 | 5.74  | -    | 6.82  | - | 5.40  |
| Diameter of postzygapophysis                | -     | 6.75 | -     | - | -     |
| Length of ventral process                   | -     | -    | -     | - | 11.91 |
