# Supplementary material
Source: publisher figshare collection journal article supplement (https://tandf.figshare.com/articles/dataset/_/5281297)
Supplement: Supplementary file 8 [file 1]

## Supplementary Appendix 7

Various measures necessary for evolutionary rate calculation based on dataset of present study are showing. The procedure of evolutionary rates calculation followed Brusatte (2011). Branch numbers correspond to that of Supplemental Appendix 8.

| Branch to             | Character Change | Missing Data | Comparable Character | Time Duration | Patristic Dissimilarity | Rate   |
|-----------------------|------------------|--------------|----------------------|---------------|-------------------------|--------|
| <i>Archaeopteryx</i>  | 0                | 31           | 208                  | 1             | 0                       | 0      |
| <i>Protopteryx</i>    | 0                | 149          | 90                   | 7.367         | 0                       | 0      |
| <i>Pengornis</i>      | 0                | 111          | 128                  | 28.017        | 0                       | 0      |
| <i>Apsaravis</i>      | 12               | 64           | 175                  | 65.372        | 0.06857                 | 0.001  |
| <i>Gansus</i>         | 2                | 32           | 207                  | 7.711         | 0.00966                 | 0.0013 |
| <i>Enaliornis</i>     | 1                | 157          | 82                   | 6.654         | 0.0122                  | 0.0018 |
| <i>Pasquiaornis</i>   | 3                | 74           | 165                  | 4.775         | 0.01818                 | 0.0038 |
| <i>Chupkaornis</i>    | 0                | 221          | 18                   | 5.25          | 0                       | 0      |
| <i>Brodavis</i>       | 1                | 152          | 87                   | 10.65         | 0.01149                 | 0.0011 |
| <i>Baptornis</i>      | 1                | 76           | 163                  | 5             | 0.00613                 | 0.0012 |
| <i>Fumicollis</i>     | 2                | 106          | 133                  | 3.75          | 0.01504                 | 0.004  |
| <i>Paraesperornis</i> | 0                | 40           | 199                  | 2.5           | 0                       | 0      |
| <i>H. regalis</i>     | 1                | 41           | 198                  | 1.25          | 0.00505                 | 0.004  |
| <i>H. gracilis</i>    | 0                | 143          | 96                   | 1.25          | 0                       | 0      |
| <i>Ichthyornis</i>    | 6                | 21           | 218                  | 20.429        | 0.02752                 | 0.0013 |
| <i>Lithornis</i>      | 3                | 11           | 228                  | 9.55          | 0.01316                 | 0.0014 |
| <i>Vegavis</i>        | 2                | 177          | 62                   | 6.116         | 0.03226                 | 0.0053 |
| <i>Crypturellus</i>   | 3                | 5            | 234                  | 59.5          | 0.01282                 | 0.0002 |
| <i>Chauna</i>         | 7                | 5            | 234                  | 81.281        | 0.02991                 | 0.0004 |
| <i>Anas</i>           | 0                | 5            | 234                  | 75.166        | 0                       | 0      |
| <i>Gallus</i>         | 0                | 4            | 235                  | 34.525        | 0                       | 0      |
| <i>Phasianus</i>      | 0                | 6            | 233                  | 34.525        | 0                       | 0      |
| 23                    | 3                | 0            | 239                  | 7.367         | 0.01255                 | 0.0017 |
| 24                    | 0                | 0            | 239                  | 7.367         | 0                       | 0      |
| 25                    | 23               | 0            | 239                  | 7.711         | 0.09623                 | 0.0125 |
| 26                    | 14               | 0            | 239                  | 7.711         | 0.05858                 | 0.0076 |
| 28                    | 8                | 0            | 239                  | 6.654         | 0.03347                 | 0.005  |
| 27                    | 8                | 0            | 239                  | 6.654         | 0.03347                 | 0.005  |

|    |    |   |     |        |         |        |
|----|----|---|-----|--------|---------|--------|
| 29 | 3  | 0 | 239 | 11.429 | 0.01255 | 0.0011 |
| 30 | 2  | 0 | 239 | 10.025 | 0.00837 | 0.0008 |
| 31 | 1  | 0 | 239 | 6.5    | 0.00418 | 0.0006 |
| 32 | 1  | 0 | 239 | 1.25   | 0.00418 | 0.0033 |
| 33 | 5  | 0 | 239 | 1.25   | 0.02092 | 0.0167 |
| 34 | 32 | 0 | 239 | 1.25   | 0.13389 | 0.1071 |
| 35 | 7  | 0 | 239 | 1.25   | 0.02929 | 0.0234 |
| 36 | 8  | 0 | 239 | 20.429 | 0.03347 | 0.0016 |
| 37 | 5  | 0 | 239 | 34.013 | 0.02092 | 0.0006 |
| 38 | 22 | 0 | 239 | 6.116  | 0.09205 | 0.0151 |
| 39 | 2  | 0 | 239 | 6.116  | 0.00837 | 0.0014 |
| 40 | 4  | 0 | 239 | 6.116  | 0.01674 | 0.0027 |
| 41 | 6  | 0 | 239 | 6.116  | 0.0251  | 0.0041 |
| 42 | 5  | 0 | 239 | 52.872 | 0.02092 | 0.0004 |
